# Supplementary material
Source: PubMed Central journal article supplement (PMC3195480)
Supplement: JCI58818sd.pdf [file JCI58818sd.pdf]

## Supplemental File

### **TRAF6 is an amplified oncogene bridging the Ras and nuclear factor- $\kappa$ B cascade in human lung cancer**

Daniel T. Starczynowski, William W. Lockwood, Sophie Delehouzee, Raj Chari, Joanna Wegrzyn, Megan Fuller, Ming-Sound Tsao, Stephen Lam, Adi F. Gazdar, Wan L. Lam, and Aly Karsan

Supplemental Table 1  
Supplemental Table 2  
Supplemental Table 3  
Supplemental Figure 1  
Supplemental Figure 2  
Supplemental Figure 3  
Supplemental Figure 4

**Supplemental Table 1. Candidate genes within the minimally amplified region on 11p12-13.**

| <b>Gene</b>          | <b>BP Start</b> | <b>BP End</b> | <b>Corrected p-value</b> | <b><math>-\log^2</math> (p-value)</b> |
|----------------------|-----------------|---------------|--------------------------|---------------------------------------|
| <b>WT1</b>           | 32367179        | 32374525      | 8.11                     | -3.02                                 |
| <b>WIT1</b>          | 32416050        | 32418194      | 8.64                     | -3.11                                 |
| <b>CCDC73</b>        | 32583302        | 32583772      | 2.18                     | -1.13                                 |
| <b>PRRG4</b>         | 32808208        | 32831960      | 6.15                     | -2.62                                 |
| <b>QSER1</b>         | 32954688        | 32955419      | 0.87                     | 0.20                                  |
| <b>DEPDC7</b>        | 32993984        | 33011702      | 2.19                     | -1.13                                 |
| <b>TCP11L1</b>       | 33018152        | 33050970      | 0.09                     | 3.46                                  |
| <b>HIPK3</b>         | 33236667        | 33317648      | 4.37                     | -2.13                                 |
| <b>C11orf41</b>      | 33521049        | 33648259      | 17.00                    | -4.09                                 |
| <b>CD59</b>          | 33683293        | 33685857      | 0.17                     | 2.59                                  |
| <b>FBXO3</b>         | 33724529        | 33752604      | 1.39                     | -0.47                                 |
| <b>LMO2</b>          | 33849728        | 33850120      | 3.40                     | -1.76                                 |
| <b>NAT10</b>         | 34083724        | 34125033      | 2.92                     | -1.55                                 |
| <b>ABTB2</b>         | 34129110        | 34138411      | 6.16                     | -2.62                                 |
| <b>CAT</b>           | 34417068        | 34450183      | 3.12                     | -1.64                                 |
| <b>ELF5</b>          | 34456918        | 34491891      | 5.59                     | -2.48                                 |
| <b>EHF</b>           | 34620414        | 34625184      | 3.99                     | -1.99                                 |
| <b>APIP</b>          | 34860420        | 34894484      | 2.67                     | -1.42                                 |
| <b>PDHX</b>          | 34894740        | 34974092      | 1.28                     | -0.35                                 |
| <b>NA</b>            | 35183185        | 35186287      | 0.50                     | 0.99                                  |
| <b>CD44</b>          | 35208209        | 35210525      | 0.13                     | 2.99                                  |
| <b>SLC1A2</b>        | 35369662        | 35398088      | 8.65                     | -3.11                                 |
| <b>DKFZP586H2123</b> | 35409953        | 35411017      | 9.30                     | -3.22                                 |
| <b>FJX1</b>          | 35596630        | 35598988      | 5.03                     | -2.33                                 |
| <b>TRIM44</b>        | 35640926        | 35789178      | 1.08                     | -0.11                                 |
| <b>COMMD9</b>        | 36252085        | 36267555      | 0.10                     | 3.38                                  |
| <b>FLJ14213</b>      | 36430384        | 36430982      | 0.23                     | 2.10                                  |
| <b>TRAF6</b>         | 36467531        | 36488372      | 0.01                     | 6.43                                  |
| <b>RAG1</b>          | 36546138        | 36557840      | 16.43                    | -4.04                                 |
| <b>RAG2</b>          | 36570311        | 36571274      | 16.50                    | -4.04                                 |
| <b>C11orf74</b>      | 36572632        | 36637398      | 7.65                     | -2.93                                 |

Supplemental Table 2. Lung cancer cell lines.

| Name     | ATCC Number | Classifier                                                             | amp 11p13* |
|----------|-------------|------------------------------------------------------------------------|------------|
| A549     | CCL-185     | Non-Small Cell Lung Cancer (NSCLC), Adenocarcinoma (AC)                | Yes        |
| Calu-1   | HTB-54      | Epidermoid Carcinoma                                                   |            |
| Calu-3   | HTB-55      | Non-Small Cell Lung Cancer (NSCLC), Adenocarcinoma (AC)                |            |
| Calu-6   | HTB-56      | Anaplastic Carcinoma                                                   |            |
| EKVX     | N/A         | Non-Small Cell Lung Cancer (NSCLC), Adenocarcinoma (AC), NCI-60        |            |
| H1155    | CRL-5818    | Non-Small Cell Lung Cancer (NSCLC), Large Cell Carcinoma (LCC)         |            |
| H1184    | CRL-5858    | Small Cell Lung Cancer (SCLC)                                          |            |
| H1299    | CRL-5803    | Non-Small Cell Lung Cancer (NSCLC), Large Cell Carcinoma (LCC)         |            |
| H1355    | CRL-5865    | Non-Small Cell Lung Cancer (NSCLC), Adenocarcinoma (AC)                |            |
| H1395    | CRL-5868    | Non-Small Cell Lung Cancer (NSCLC), Adenocarcinoma (AC)                |            |
| H1437    | CRL-5872    | Non-Small Cell Lung Cancer (NSCLC), Adenocarcinoma (AC)                |            |
| H146     | HTB-173     | Small Cell Lung Cancer (SCLC)                                          |            |
| H157     | CRL-5802    | Non-Small Cell Lung Cancer (NSCLC), Squamous Cell Carcinoma (SqCC)     | Yes        |
| H1607    | N/A         | Small Cell Lung Cancer (SCLC)                                          |            |
| H1648    | CRL-5882    | Non-Small Cell Lung Cancer (NSCLC), Adenocarcinoma (AC)                |            |
| H1650    | CRL-5883    | Non-Small Cell Lung Cancer (NSCLC), Bronchioalveolar carcinoma (BAC)   | Yes        |
| H1666    | CRL-5885    | Non-Small Cell Lung Cancer (NSCLC), Bronchioalveolar carcinoma (BAC)   |            |
| H1672    | CRL-5886    | Small Cell Lung Cancer (SCLC)                                          |            |
| H1755    | CRL-5892    | Non-Small Cell Lung Cancer (NSCLC), Adenocarcinoma (AC)                |            |
| H1770    | CRL-5893    | Neuroendocrine                                                         |            |
| H1781    | CRL-5894    | Non-Small Cell Lung Cancer (NSCLC), Bronchioalveolar carcinoma (BAC)   |            |
| H1819    | CRL-5897    | Non-Small Cell Lung Cancer (NSCLC), Adenocarcinoma (AC)                |            |
| H187     | CRL-5804    | Small Cell Lung Cancer (SCLC)                                          |            |
| H1975    | CRL-5908    | Non-Small Cell Lung Cancer (NSCLC), Adenocarcinoma (AC)                |            |
| H1993    | CRL-5909    | Non-Small Cell Lung Cancer (NSCLC), Adenocarcinoma (AC)                |            |
| H2009    | CRL-5911    | Non-Small Cell Lung Cancer (NSCLC), Adenocarcinoma (AC)                |            |
| H2052    | CRL-5915    | Mesothelioma (ME)                                                      |            |
| H2073    | CRL-5918    | Non-Small Cell Lung Cancer (NSCLC), Adenocarcinoma (AC)                |            |
| H2085    | CRL-5921    | Non-Small Cell Lung Cancer (NSCLC), Adenocarcinoma (AC)                |            |
| H2087    | CRL-5922    | Non-Small Cell Lung Cancer (NSCLC), Adenocarcinoma (AC)                |            |
| H2107    | CRL-5983    | Small Cell Lung Cancer (SCLC)                                          |            |
| H2122    | CRL-5985    | Non-Small Cell Lung Cancer (NSCLC), Adenocarcinoma (AC)                |            |
| H2126    | CCL-256     | Non-Small Cell Lung Cancer (NSCLC), Adenocarcinoma (AC)                |            |
| H2141    | CRL-5927    | Small Cell Lung Cancer (SCLC)                                          |            |
| H2170    | CRL-5928    | Non-Small Cell Lung Cancer (NSCLC), Squamous Cell Carcinoma (SqCC)     |            |
| H2171    | CRL-5929    | Small Cell Lung Cancer (SCLC)                                          | Yes        |
| H2228    | CRL-5935    | Non-Small Cell Lung Cancer (NSCLC), Adenocarcinoma (AC)                |            |
| H226     | CRL-5826    | Non-Small Cell Lung Cancer (NSCLC), Squamous Cell Carcinoma (SqCC)     |            |
| H2347    | CRL-5942    | Non-Small Cell Lung Cancer (NSCLC), Adenocarcinoma (AC)                |            |
| H2882    | N/A         | Non-Small Cell Lung Cancer (NSCLC)                                     |            |
| H2887    | N/A         | Non-Small Cell Lung Cancer (NSCLC)                                     | Yes        |
| H289     | N/A         | Small Cell Lung Cancer (SCLC)                                          |            |
| H3122    | N/A         | Non-Small Cell Lung Cancer (NSCLC)                                     |            |
| H322     | N/A         | Non-Small Cell Lung Cancer (NSCLC), Bronchioalveolar carcinoma (BAC)   |            |
| H3255    | N/A         | Non-Small Cell Lung Cancer (NSCLC), Adenocarcinoma (AC)                | Yes        |
| H358     | CRL-5807    | Non-Small Cell Lung Cancer (NSCLC), Bronchioalveolar carcinoma (BAC)   |            |
| H378     | CRL-5808    | Small Cell Lung Cancer (SCLC)                                          |            |
| H441     | HTB-174     | Non-Small Cell Lung Cancer (NSCLC), Adenocarcinoma (AC)                |            |
| H460     | HTB-177     | Non-Small Cell Lung Cancer (NSCLC), Large Cell Carcinoma (LCC)         |            |
| H520     | HTB-182     | Non-Small Cell Lung Cancer (NSCLC), Squamous Cell Carcinoma (SqCC)     |            |
| H524     | CRL-5831    | Small Cell Lung Cancer (SCLC)                                          |            |
| H526     | CRL-5811    | Small Cell Lung Cancer (SCLC)                                          | Yes        |
| H82      | HTB-175     | Small Cell Lung Cancer (SCLC)                                          |            |
| H820     | N/A         | Non-Small Cell Lung Cancer (NSCLC), Bronchioalveolar carcinoma (BAC)   |            |
| H841     | CRL-5845    | Small Cell Lung Cancer (SCLC)                                          |            |
| H889     | CRL-5817    | Small Cell Lung Cancer (SCLC)                                          |            |
| HCC1171  | N/A         | Non-Small Cell Lung Cancer (NSCLC)                                     |            |
| HCC1195  | N/A         | Non-Small Cell Lung Cancer (NSCLC), Adenocarcinoma (AC)                |            |
| HCC1359  | N/A         | Non-Small Cell Lung Cancer (NSCLC), Large Cell Carcinoma (LCC)         |            |
| HCC15    | N/A         | Non-Small Cell Lung Cancer (NSCLC), Squamous Cell Carcinoma (SqCC)     |            |
| HCC1719  | N/A         | Lung Cancer                                                            | Yes        |
| HCC1833  | N/A         | Non-Small Cell Lung Cancer (NSCLC), Adenocarcinoma (AC)                |            |
| HCC193   | N/A         | Non-Small Cell Lung Cancer (NSCLC), Adenocarcinoma (AC)                | Yes        |
| HCC2279  | N/A         | Non-Small Cell Lung Cancer (NSCLC), Adenocarcinoma (AC)                |            |
| HCC2450  | N/A         | Non-Small Cell Lung Cancer (NSCLC), Squamous Cell Carcinoma (SqCC)     |            |
| HCC2935  | CRL-2869    | Non-Small Cell Lung Cancer (NSCLC), Adenocarcinoma (AC)                |            |
| HCC33    | N/A         | Small Cell Lung Cancer (SCLC)                                          |            |
| HCC366   | N/A         | Non-Small Cell Lung Cancer (NSCLC), Adenocarcinoma (AC)                | Yes        |
| HCC4006  | CRL-2871    | Non-Small Cell Lung Cancer (NSCLC), Adenocarcinoma (AC)                | Yes        |
| HCC4011  | N/A         | Non-Small Cell Lung Cancer (NSCLC)                                     |            |
| HCC4017  | N/A         | Non-Small Cell Lung Cancer (NSCLC)                                     |            |
| HCC44    | N/A         | Non-Small Cell Lung Cancer (NSCLC)                                     |            |
| HCC461   | N/A         | Non-Small Cell Lung Cancer (NSCLC), Adenocarcinoma (AC)                | Yes        |
| HCC515   | N/A         | Non-Small Cell Lung Cancer (NSCLC), Adenocarcinoma (AC)                |            |
| HCC78    | N/A         | Non-Small Cell Lung Cancer (NSCLC), Adenocarcinoma (AC)                |            |
| HCC827   | CRL-2868    | Non-Small Cell Lung Cancer (NSCLC), Adenocarcinoma (AC)                |            |
| HCC95    | N/A         | Non-Small Cell Lung Cancer (NSCLC), Squamous Cell Carcinoma (SqCC)     | Yes        |
| HOP 62   | N/A         | Non-Small Cell Lung Cancer (NSCLC), Adenocarcinoma (AC), NCI-60        |            |
| HOP 92   | N/A         | Non-Small Cell Lung Cancer (NSCLC), Large Cell Carcinoma (LCC), NCI-60 |            |
| NCI-H23  | CRL-5800    | Non-Small Cell Lung Cancer (NSCLC), Adenocarcinoma (AC), NCI-60        |            |
| NCI-H522 | CRL-5810    | Non-Small Cell Lung Cancer (NSCLC), Adenocarcinoma (AC), NCI-60        | Yes        |
| PC3      | N/A         | Lung Cancer                                                            |            |
| PC9      | N/A         | Lung Cancer                                                            | Yes        |
| SK-MES-1 | HTB-58      | Non-Small Cell Lung Cancer (NSCLC), Squamous Cell Carcinoma (SqCC)     | Yes        |
| SW900    | HTB-59      | Non-Small Cell Lung Cancer (NSCLC), Squamous Cell Carcinoma (SqCC)     | Yes        |

N/A, not available; \*, amplification includes TRAF6

**Supplemental Table 3. Description of TRAF6 and KRAS alterations in the lung cancer cell lines.**

|                       | <b>H1395</b> | <b>H520</b> | <b>H460</b> | <b>H2347</b> | <b>HCC95</b>   | <b>SK-MES</b> |
|-----------------------|--------------|-------------|-------------|--------------|----------------|---------------|
| <b>TRAF6 Amp</b>      | No           | No          | No          | No           | <b>Yes</b>     | <b>Yes</b>    |
| <b>KRAS Mutation</b>  | No           | No          | <b>Yes</b>  | <b>Yes</b>   | No             | No            |
| <b>KRAS Signature</b> | No           | No          | <b>Yes</b>  | <b>Yes</b>   | <i>unknown</i> | <b>Yes</b>    |

**Supplemental Figure 1.** TRAF6 mRNA is overexpressed in lung cancer with 11p13 amplifications.

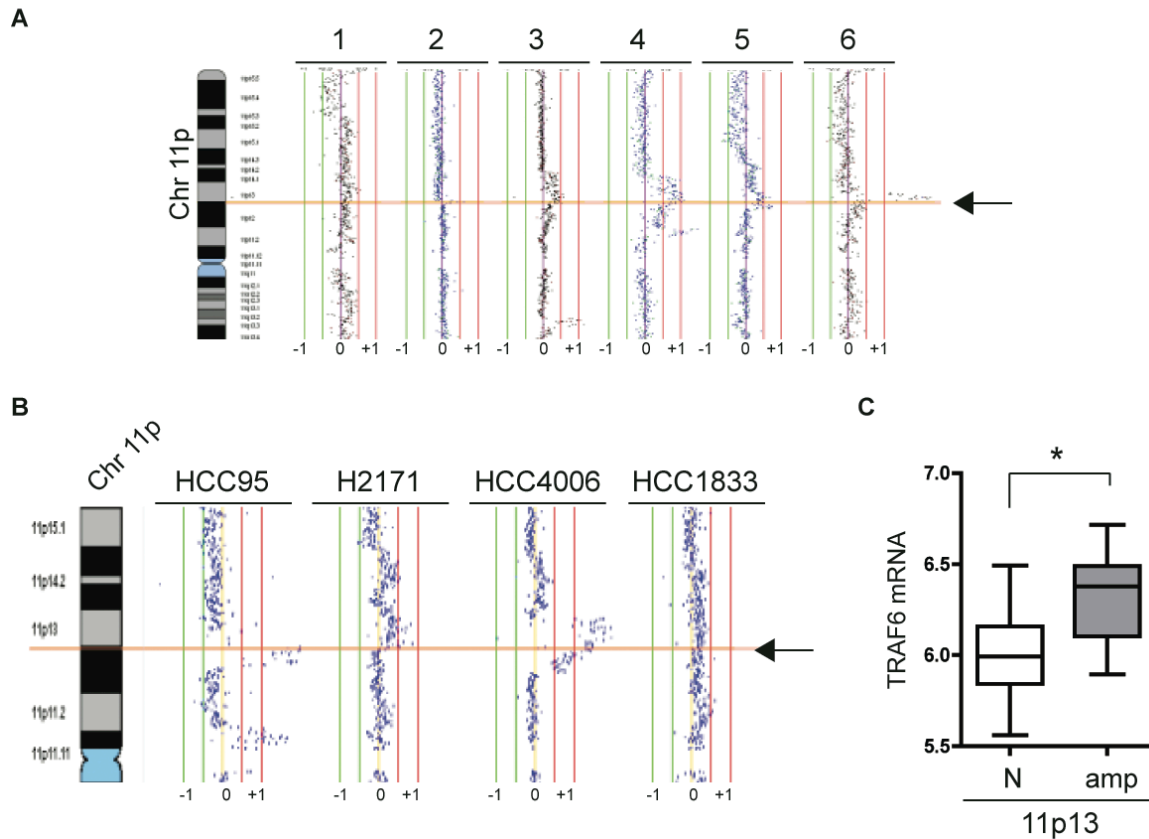

**Supplemental Figure 1. TRAF6 is overexpressed in lung cancer with chr 11p13 amplifications.**

**A.** The copy number status of chromosome 11p is shown for six representative lung cancer tumors (#1-6). The minimally amplified region spanning chr 11p13 (32,126,542) to chr 11p12 (37,251,933) is indicated with the arrow. Normalized  $\log_2$  signal intensity ratios were plotted and visualized by *SIGMA*<sup>2</sup>. Vertical lines denote  $\log_2$  signal ratios from -1 to +1. Copy number gains are shown to the right of 0 (red). Each black dot represents a single BAC clone. **B.** Alignment of aCGH profiles at chromosome 11p13 from four lung cancer samples. **C.** Expression of *TRAF6* mRNA ( $\log_2$ ) in lung cancer cell lines with (n = 13) and without amplification of the *TRAF6* locus, chr 11p13 (n = 31) ( $p = 0.00034$ ).

**Supplemental Figure 2. Validation of TRAF6 inhibition by RNAi in lung cancer cells.**

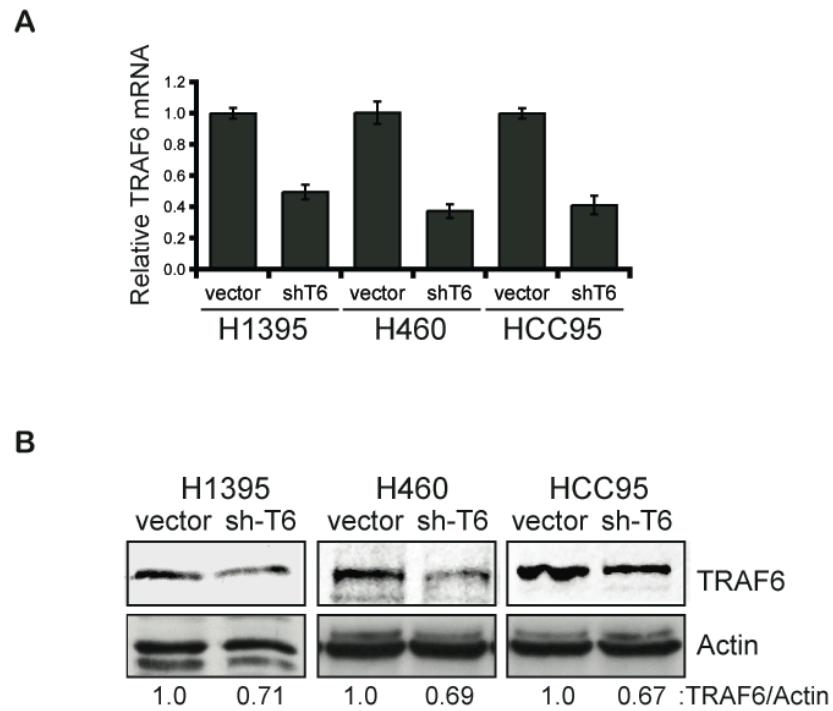

**Supplemental Figure 2. Validation of TRAF6 inhibition by RNAi in lung cancer cells.** Quantitative PCR (TRAF6 and GAPDH mRNA) (A) and immunoblotting (TRAF6 and actin protein) (B) is shown after inhibition of TRAF6 (shT6) in the indicated cell lines.

**Supplemental Figure 3.** Inhibition of candidate genes on chromosome 11p13 in lung cancer cells.

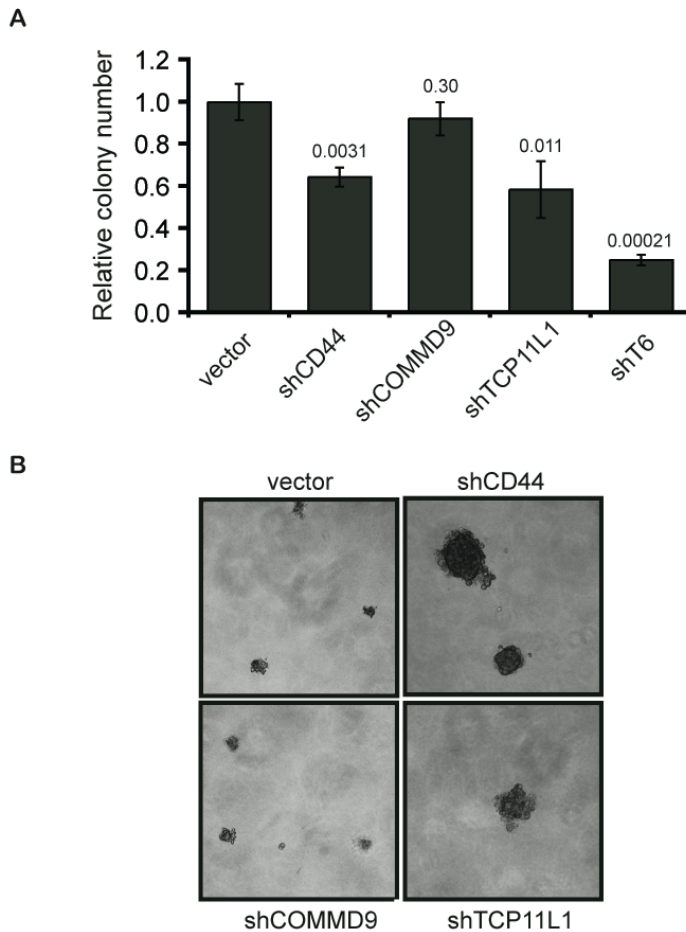

**Supplemental Figure 3. Inhibition of candidate genes on chromosome 11p13 in lung cancer cells.**

Lung cancer cells with amplification of 11p13 (HCC95) were transduced with virus encoding shRNA constructs specific for CD44, COMMD9, TCP11L1, and TRAF6. Transduced cell lines were selected in puromycin and analyzed for colony formation in 0.3% soft agar and confirmation of target gene knockdown by qPCR. **A.** Colony numbers for the indicated transduced cell lines are shown relative to vector-transduced cells (1.0). The corresponding target gene knockdown is shown below. Colony formation of shCOMMD9-expressing cells may be in part explained by the less efficient knockdown of COMMD9. **B.** Representative colonies are shown for the indicated transduced cell lines at 20X magnification. Data is shown from one experiment performed in triplicate. P values are indicated above the histogram. Data are represented as mean  $\pm$  SEM.

**Supplemental Figure 4. Inhibition of TRAF6 suppresses breast cancer lines.**

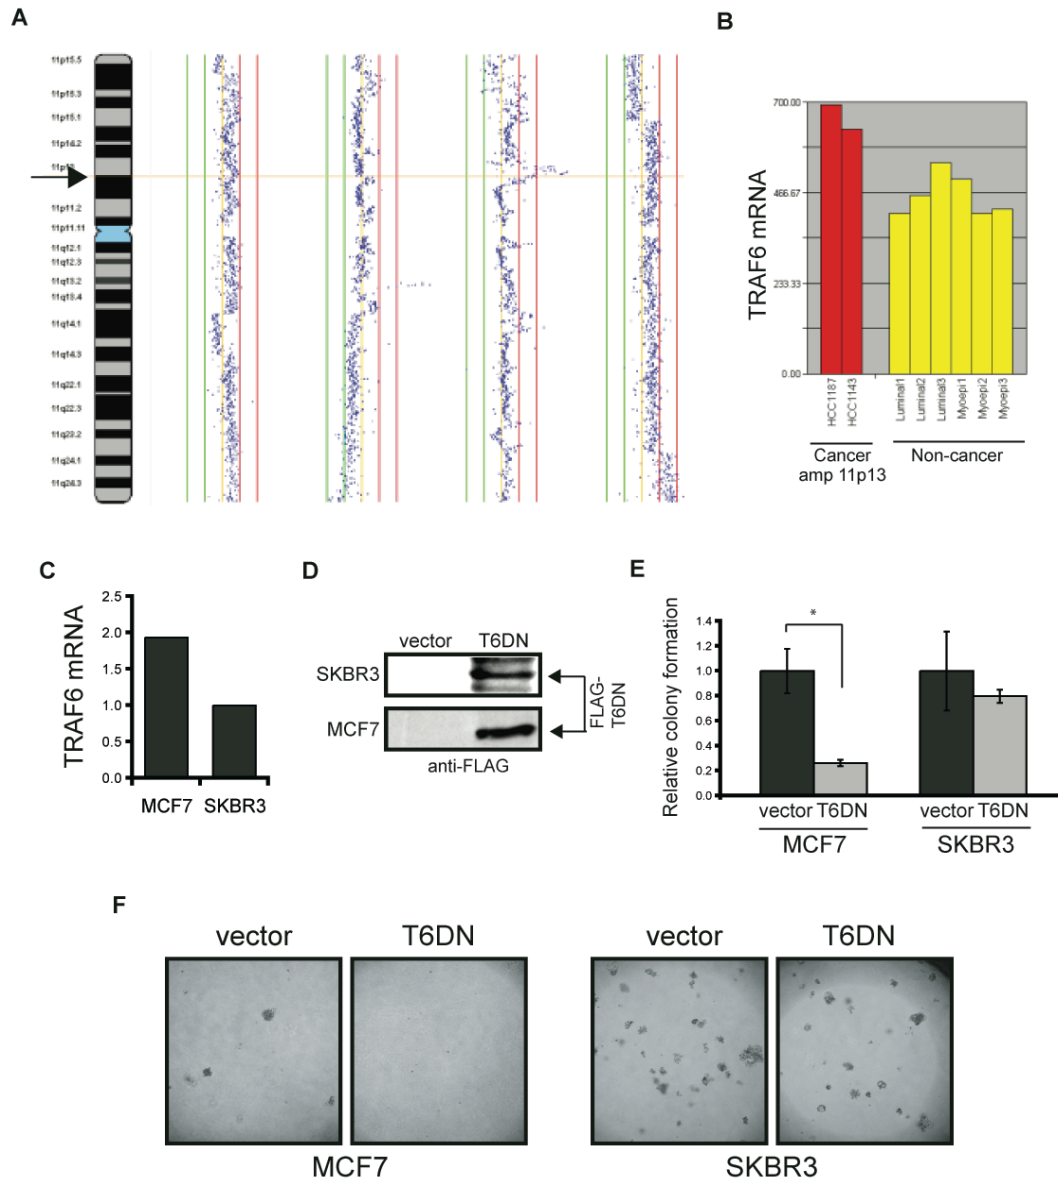

**Supplemental Figure 4. Inhibition of TRAF6 suppresses breast cancer lines.**

**A.** Alignment of aCGH profiles at chromosome 11p13 from 4 breast cancer samples. The arrow indicates the location of the *TRAF6* locus. Normalized  $\log_2$  signal intensity ratios were plotted and visualized by *SIGMA*<sup>2</sup>. Vertical lines denote  $\log_2$  signal ratios from  $-1$  to  $+1$ . Copy number decreases are shown to the left of 0 (green). Each black dot represents a single BAC clone. **B.** Expression of *TRAF6* mRNA in breast cancer samples with ( $n = 2$ ) amplification at band 11p13, as well as normal controls ( $n = 6$ ). **C.** *TRAF6* mRNA from MCF7 and SKBR3 was measured by qPCR and shown relative to SKBR3 (1.0). As shown, MCF7 cells exhibit higher (two-fold) expression of *TRAF6* mRNA. **D.** MCF7 and SKBR3 were transduced with vector- or TRAF6-dominant negative (FLAG-T6DN)-containing virus. Expression of T6DN was determined by anti-FLAG immunoblotting. **E-F.** Vector- and T6DN-expressing MCF7 and SKBR3 cells were analyzed for colony formation in 0.3% soft agar. Data are represented as mean  $\pm$  SEM. \*,  $p = 0.024$
